# Supplementary material
Source: Springer Nature journal article supplement (https://www.springermedizin.de/resource/supplementary/12935_2010_269_MOESM1_ESM.pdf/9540186)

### Gene expression pattern A

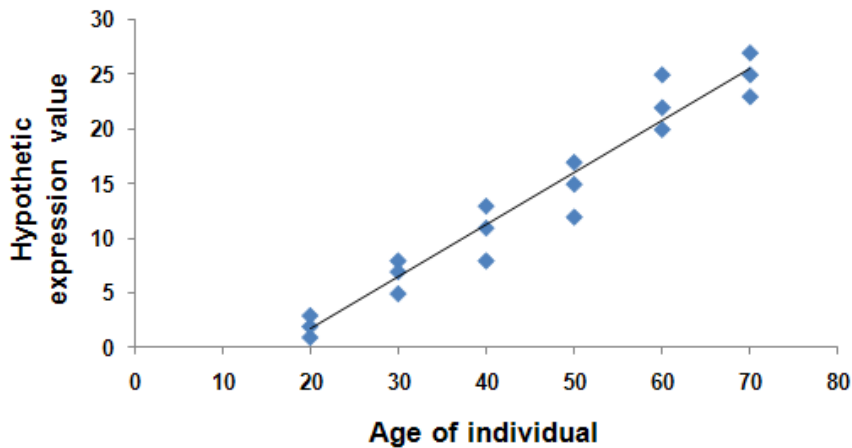

### Gene expression pattern B

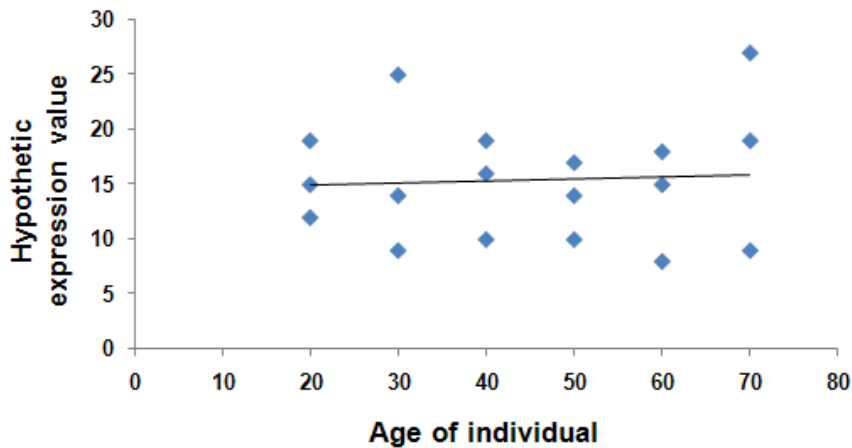

Supplement: MOESM1 [file 9540186]
